# Supplementary material for: Palladium-catalyzed formation of phenolic compounds by reaction of carbonyl compounds with carbon dioxide
Source: Royal Society of Chemistry journal article supplement (doi:10.1039/c2cc37194d), 2012-01-01

## Supporting Information

### **Palladium-catalyzed formation of phenolic compounds by a reaction of carbonyl compounds with carbon dioxide**

Qi Gao,<sup>a</sup> Xian-chun Tan,<sup>a</sup> Ying-ming Pan,<sup>\*a</sup> Heng-shan Wang<sup>a</sup> and Ying Liang<sup>\*b</sup>

<sup>a</sup> Key Laboratory for the Chemistry and Molecular Engineering of Medicinal Resources (Ministry of Education of China), School of Chemistry & Chemical Engineering of Guangxi Normal University, Guilin 541004, China

<sup>b</sup> School of Life and Environmental Sciences, Guilin University of Electronic Technology, Guilin, 541004, China

### **Table of Contents**

|                                                                                      |               |
|--------------------------------------------------------------------------------------|---------------|
| <b>1 General Information .....</b>                                                   | <b>S2</b>     |
| <b>2 General Experimental Procedure.....</b>                                         | <b>S2</b>     |
| <b>3 Optimization of Reaction Condtions.....</b>                                     | <b>S3</b>     |
| <b>4 Contrast Experiment.....</b>                                                    | <b>S3-4</b>   |
| <b>5 Characterization of the Compounds .....</b>                                     | <b>S4-7</b>   |
| <b>6 References.....</b>                                                             | <b>S7</b>     |
| <b>7 Copies of <sup>1</sup>H NMR and <sup>13</sup>C NMR Spectra of Products.....</b> | <b>S8-19</b>  |
| <b>8 Copies of HRMS Spectra of Products.....</b>                                     | <b>S20-23</b> |

## 1 General Information

**Methods.** All manipulations were performed under an air atmosphere unless otherwise stated. Column chromatography was performed on silica gel (300–400 mesh). NMR spectra were obtained using a Bruker Avance 500 spectrometer ( $^1\text{H}$  at 500 MHz and  $^{13}\text{C}$  at 125 MHz). Chemical shifts for  $^1\text{H}$  NMR spectra are reported in parts per million (ppm) from tetramethylsilane with the solvent resonance as the internal standard ( $\text{CDCl}_3$ :  $\delta$  7.26 ppm). Chemical shifts for  $^{13}\text{C}$  NMR spectra are reported in parts per million (ppm) from tetramethylsilane with the solvent as the internal standard ( $\text{CDCl}_3$ :  $\delta$  77.0 ppm). High resolution mass spectra (HRMS) were recorded on the Exactive Mass Spectrometer (Thermo Scientific, USA) equipped with ESI ionization source.

**Materials.** Unless stated otherwise, commercial reagents were used without further purification. All reagents were weighed and handled in air at room temperature.

## 2 General Experimental Procedure

The reaction mixture of carbonyl compounds **1** (0.6 mmol),  $\text{Pd}(\text{OAc})_2$  (6.7 mg, 5 mol %),  $\text{K}_2\text{CO}_3$  (41.4 mg, 0.5 eq) and DMF (1 mL) in a 10 mL flask was stirred at 100 °C under an air atmosphere and monitored periodically by TLC. Upon completion, the reaction mixture was diluted with water (30 mL) and extracted with ethyl acetate ( $3 \times 30$  mL). The combined organic layers were washed with water and brine, dried over  $\text{Na}_2\text{SO}_4$  and filtered. The solvent was removed under vacuum. The residue was purified by flash column chromatography to afford the product.

### 3 Optimization of Reaction Conditions<sup>a</sup>

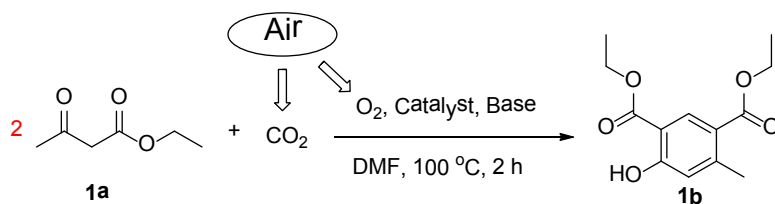

| Entry | Catalyst                   | Base                                              | Yield [%] <sup>b</sup> |
|-------|----------------------------|---------------------------------------------------|------------------------|
| 1     | <b>Pd(OAc)<sub>2</sub></b> | <b>K<sub>2</sub>CO<sub>3</sub> (0.5 eq)</b>       | <b>91</b>              |
| 2     | Pd(OAc) <sub>2</sub>       | K <sub>2</sub> CO <sub>3</sub> (0.2 eq)           | 43                     |
| 3     | Pd(OAc) <sub>2</sub>       | K <sub>2</sub> CO <sub>3</sub> (1.0 eq)           | 66                     |
| 2     | InCl <sub>3</sub>          | K <sub>2</sub> CO <sub>3</sub>                    | 0                      |
| 3     | In(OTf) <sub>3</sub>       | K <sub>2</sub> CO <sub>3</sub>                    | 0                      |
| 4     | FeCl <sub>3</sub>          | K <sub>2</sub> CO <sub>3</sub>                    | 20                     |
| 5     | Fe(OTf) <sub>3</sub>       | K <sub>2</sub> CO <sub>3</sub>                    | 28                     |
| 6     | CuCl <sub>2</sub>          | K <sub>2</sub> CO <sub>3</sub>                    | 0                      |
| 7     | Cu(OTf) <sub>2</sub>       | K <sub>2</sub> CO <sub>3</sub>                    | 0                      |
| 8     | CuCl                       | K <sub>2</sub> CO <sub>3</sub>                    | 0                      |
| 9     | BiCl <sub>3</sub>          | K <sub>2</sub> CO <sub>3</sub>                    | 31                     |
| 10    | Pd(OAc) <sub>2</sub>       | Cs <sub>2</sub> CO <sub>3</sub>                   | 56                     |
| 11    | Pd(OAc) <sub>2</sub>       | NaHCO <sub>3</sub>                                | 47                     |
| 12    | Pd(OAc) <sub>2</sub>       | CH <sub>3</sub> COONa                             | 0                      |
| 13    | Pd(OAc) <sub>2</sub>       | HOCH <sub>2</sub> CH <sub>2</sub> NH <sub>2</sub> | 0                      |
| 14    | Pd(OAc) <sub>2</sub>       | KOH                                               | 0                      |

<sup>a</sup> Reaction conditions: **1a** (0.6 mmol), air (1 atm), catalyst (5 mol %), base (0.5 equiv), DMF (1 mL), 100 °C, 2 h. <sup>b</sup> Isolated yield of pure product based on **1a**.

### 4 Contrast Experiment

In order to prove the  $\text{CO}_2$  was come from the air, we did a series of control experiments. When the reaction was proceed under the Ar,  $\text{CO}_2$ , or  $\text{O}_2$  atmosphere, there was no desired product observed. Interesting, the reaction were conducted well in the presence of the mixture of  $\text{O}_2$  and  $\text{CO}_2$ , what is more, the yield of the product was slightly higher than in the air atmosphere. On the basis of the above experimental observations, we came to the conclusion that the  $\text{CO}_2$  did participate in the reaction. Meanwhile,  $\text{O}_2$  played an important role in this process.

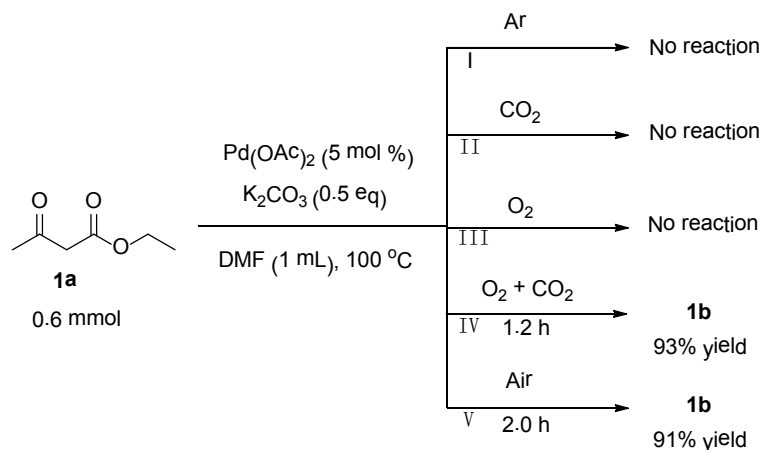

**Scheme 1 I.** In the presence of Argon. II. In the presence of  $\text{CO}_2$ . III. In the presence of  $\text{O}_2$ . IV. In the presence of  $\text{O}_2$  (20%) and  $\text{CO}_2$  (80%). V. In the presence of air.

## 5 Characterization of the Compounds

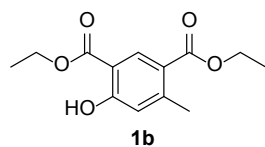

**Diethyl 4-hydroxy-6-methylisophthalate.** Isolated by column

chromatography (silica gel, PE /EA = 50/1), yellow oil:  $^1\text{H NMR}$  (500 MHz,  $\text{CDCl}_3$ )  $\delta$  11.09 (s, 1H), 8.47 (s, 1H), 6.83 (s, 1H), 4.43 (q,  $J = 7.1$  Hz, 2H), 4.35 (q,  $J = 7.1$  Hz, 2H), 2.60 (s, 3H), 1.43 (t,  $J = 7.1$  Hz, 3H), 1.40 (t,  $J = 7.1$  Hz, 3H);  $^{13}\text{C NMR}$  (125 MHz,  $\text{CDCl}_3$ )  $\delta$  169.70, 166.50, 163.80, 149.02, 133.73, 121.42, 120.26, 110.38, 61.66, 60.70, 22.46, 14.36, 14.20; **HRMS** (m/z) (ESI): calcd for  $\text{C}_{13}\text{H}_{16}\text{O}_5[\text{M}-\text{H}^+]$ : 251.09187; found: 251.09267.

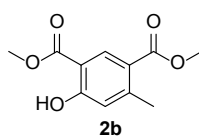

**Dimethyl 4-hydroxy-6-methylisophthalate.** Isolated by column

chromatography (silica gel, PE /EA = 50/1), white solid (mp 108-110 °C):  $^1\text{H NMR}$  (500 MHz,  $\text{CDCl}_3$ )  $\delta$  10.98 (s, 1H), 8.49 (s, 1H), 6.84 (s, 1H), 3.97 (s, 3H), 3.87 (s, 3H), 2.61 (s, 3H);  $^{13}\text{C NMR}$  (125 MHz,  $\text{CDCl}_3$ )  $\delta$  169.99, 166.67, 163.76, 149.46, 133.86, 120.91, 120.31, 110.08, 52.40, 51.75, 22.46; **HRMS** (m/z) (ESI): calcd for  $\text{C}_{11}\text{H}_{12}\text{O}_5$   $[\text{M}-\text{H}^+]$ : 223.06057; found: 223.06104.

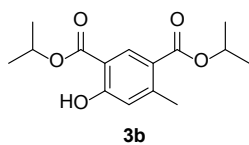

**Diisopropyl 4-hydroxy-6-methylisophthalate.** Isolated by column

chromatography (silica gel, PE /EA = 50/1), yellow oil:  $^1\text{H NMR}$  (500 MHz,  $\text{CDCl}_3$ )  $\delta$  11.17 (s,

1H), 8.42 (s, 1H), 6.81 (s, 1H), 5.29 (sep,  $J = 6.3$  Hz, 1H), 5.22 (sep,  $J = 6.3$  Hz, 1H), 2.59 (s, 3H), 1.40 (d,  $J = 6.3$  Hz, 6H), 1.37 (d,  $J = 6.2$  Hz, 6H);  $^{13}\text{C}$  NMR (125 MHz,  $\text{CDCl}_3$ )  $\delta$  169.28, 166.30, 163.71, 148.51, 133.66, 121.84, 120.14, 110.66, 69.62, 68.30, 22.59, 21.98, 21.80; HRMS (m/z) (ESI): calcd for  $\text{C}_{15}\text{H}_{20}\text{O}_5$  [ $\text{M}-\text{H}^+$ ]: 279.12317; found: 279.12399.

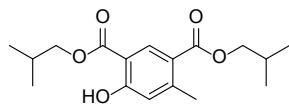

4b

**Diisobutyl 4-hydroxy-6-methylisophthalate.** Isolated by column chromatography (silica gel, PE /EA = 50/1), pale yellow solid (mp 123-125 °C):  $^1\text{H}$  NMR (500 MHz,  $\text{CDCl}_3$ )  $\delta$  11.05 (s, 1H), 8.54 (s, 1H), 6.84 (s, 1H), 4.14 (d,  $J = 6.5$  Hz, 2H), 4.07 (d,  $J = 6.4$  Hz, 2H), 2.62 (s, 3H), 2.12-2.05 (m, 2H), 1.04 (d,  $J = 4.8$  Hz, 6H), 1.03 (d,  $J = 4.8$  Hz, 6H);  $^{13}\text{C}$  NMR (125 MHz,  $\text{CDCl}_3$ )  $\delta$  169.61, 166.37, 163.77, 149.19, 133.81, 121.25, 120.25, 110.34, 71.40, 70.82, 27.88, 27.79, 22.51, 19.23, 19.03; HRMS (m/z) (ESI): calcd for  $\text{C}_{17}\text{H}_{24}\text{O}_5$  [ $\text{M}-\text{H}^+$ ]: 307.15447; found: 307.15546.

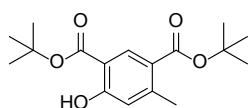

5b

**Di-tert-butyl 4-hydroxy-6-methylisophthalate.** Isolated by column chromatography (silica gel, PE /EA = 50/1), yellow oil:  $^1\text{H}$  NMR (500 MHz,  $\text{CDCl}_3$ )  $\delta$  11.22 (s, 1H), 8.35 (s, 1H), 6.77 (s, 1H), 2.56 (s, 3H), 1.61 (s, 9H), 1.59 (s, 9H).  $^{13}\text{C}$  NMR (125 MHz,  $\text{CDCl}_3$ )  $\delta$  169.35, 166.04, 163.65, 147.98, 133.96, 122.80, 120.06, 111.53, 83.17, 80.99, 28.32, 28.18, 22.54; HRMS (m/z) (ESI): calcd for  $\text{C}_{17}\text{H}_{24}\text{O}_5$  [ $\text{M}-\text{H}^+$ ]: 307.15447; found: 307.15531.

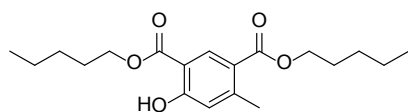

6b

**Dipentyl 4-hydroxy-6-methylisophthalate.** Isolated by column chromatography (silica gel, PE /EA = 50/1), yellow oil:  $^1\text{H}$  NMR (500 MHz,  $\text{CDCl}_3$ )  $\delta$  11.08 (s, 1H), 8.48 (s, 1H), 6.83 (s, 1H), 4.35 (t,  $J = 6.7$  Hz, 2H), 4.28 (t,  $J = 6.7$  Hz, 2H), 2.61 (s, 3H), 1.83-1.74 (m, 4H), 1.44-1.40 (m, 8H), 0.94 (t,  $J = 7.1$ , 3H), 0.93 (t,  $J = 7.1$ , 3H);  $^{13}\text{C}$  NMR (125 MHz,  $\text{CDCl}_3$ )  $\delta$  169.71, 166.51, 163.75, 149.06, 133.78, 121.33, 120.23, 110.35, 65.73, 64.88, 28.39, 28.28, 28.19, 28.05, 22.51, 22.32, 22.28, 13.97, 13.93; HRMS (m/z) (ESI): calcd for  $\text{C}_{19}\text{H}_{28}\text{O}_5$  [ $\text{M}-\text{H}^+$ ]: 335.18577; found: 335.18668.

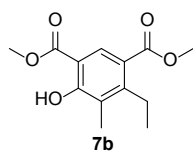

7b

**Dimethyl 4-ethyl-6-hydroxy-5-methylisophthalate.** Isolated by column chromatography (silica gel, PE /EA = 50/1), white solid (mp 58-60 °C):  $^1\text{H NMR}$  (500 MHz,  $\text{CDCl}_3$ )  $\delta$  11.39 (s, 1H), 8.30 (s, 1H), 3.96 (s, 3H), 3.87 (s, 3H), 3.02 (q,  $J = 7.5$  Hz, 2H), 2.26 (s, 3H), 1.19 (t,  $J = 7.5$  Hz, 3H);  $^{13}\text{C NMR}$  (125 MHz,  $\text{CDCl}_3$ )  $\delta$  170.52, 167.49, 162.21, 152.25, 130.73, 125.75, 120.99, 109.05, 52.37, 51.86, 24.05, 14.09, 10.80; **HRMS** (m/z) (ESI): calcd for  $\text{C}_{13}\text{H}_{16}\text{O}_5$  [ $\text{M}-\text{H}^+$ ]: 251.09187; found: 251.09244.

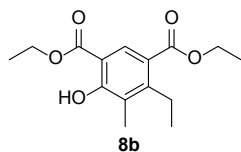

8b

**Diethyl 4-ethyl-6-hydroxy-5-methylisophthalate.** Isolated by column chromatography (silica gel, PE /EA = 50/1), white solid (mp 84-86 °C):  $^1\text{H NMR}$  (500 MHz,  $\text{CDCl}_3$ )  $\delta$  11.49 (s, 1H), 8.25 (s, 1H), 4.42 (q,  $J = 7.2$  Hz, 2H), 4.35 (q,  $J = 7.1$  Hz, 2H), 2.99 (q,  $J = 7.5$  Hz, 2H), 2.26 (s, 3H), 1.42 (t,  $J = 7.0$  Hz, 3H), 1.39 (t,  $J = 7.0$  Hz, 3H), 1.19 (t,  $J = 7.5$  Hz, 3H);  $^{13}\text{C NMR}$  (125 MHz,  $\text{CDCl}_3$ )  $\delta$  170.22, 167.52, 162.18, 151.62, 130.42, 125.62, 121.70, 109.35, 61.61, 60.80, 24.10, 14.31, 14.20, 14.17, 10.83; **HRMS** (m/z) (ESI): calcd for  $\text{C}_{15}\text{H}_{20}\text{O}_5$  [ $\text{M}-\text{H}^+$ ]: 279.12317; found: 279.12354.

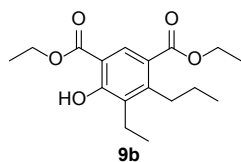

9b

**Diethyl 5-ethyl-4-hydroxy-6-propylisophthalate.** Isolated by column chromatography (silica gel, PE /EA = 50/1), yellow oil:  $^1\text{H NMR}$  (500 MHz,  $\text{CDCl}_3$ )  $\delta$  11.45 (s, 1H), 8.25 (s, 1H), 4.42 (q,  $J = 7.1$  Hz, 2H), 4.34 (q,  $J = 7.1$  Hz, 2H), 2.95-2.91 (m, 2H), 2.74 (q,  $J = 7.5$  Hz, 2H), 1.60-1.52 (m, 2H), 1.42 (t,  $J = 6.5$  Hz, 3H), 1.39 (t,  $J = 6.5$  Hz, 3H), 1.15 (t,  $J = 7.5$  Hz, 3H), 1.03 (t,  $J = 7.3$  Hz, 3H);  $^{13}\text{C NMR}$  (125 MHz,  $\text{CDCl}_3$ )  $\delta$  170.21, 167.60, 162.08, 149.63, 130.62, 126.38, 121.98, 109.48, 61.55, 60.77, 32.21, 24.69, 19.00, 14.56, 14.31, 14.20, 13.89; **HRMS** (m/z) (ESI): calcd for  $\text{C}_{17}\text{H}_{24}\text{O}_5$  [ $\text{M}-\text{H}^+$ ]: 307.15447; found: 307.15536

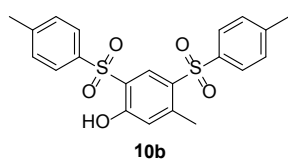

10b

**5-Methyl-2,4-ditosylphenol.** Isolated by column chromatography (silica gel, PE /EA = 50/1), yellow solid (mp 98-100 °C):  $^1\text{H NMR}$  (500 MHz,  $\text{CDCl}_3$ )  $\delta$  9.71 (s, 1H),

8.49 (s, 1H), 7.84 (d,  $J = 8.4$  Hz, 2H), 7.69 (d,  $J = 8.3$  Hz, 2H), 7.36 (d,  $J = 8.0$  Hz, 2H), 7.29 (d,  $J = 8.0$  Hz, 2H), 6.81 (s, 1H), 2.44 (s, 3H), 2.41 (s, 3H), 2.35 (s, 3H);  $^{13}\text{C}$  NMR (125 MHz,  $\text{CDCl}_3$ )  $\delta$  159.06, 146.44, 145.55, 144.40, 137.86, 137.65, 132.17, 131.69, 130.36, 129.81, 127.74, 127.05, 122.64, 122.14, 21.65, 21.56, 20.42; HRMS (m/z) (ESI): calcd for  $\text{C}_{21}\text{H}_{20}\text{O}_5\text{S}_2$  [ $\text{M}-\text{H}^+$ ]: 415.06732; found: 415.06833.

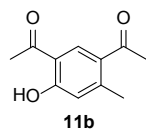

**1,1'-(4-hydroxy-6-methyl-1,3-phenylene)Diethanone<sup>1</sup>.** Isolated by column chromatography (silica gel, PE /EA = 50/1), yellow solid (mp 106-108 °C):  $^1\text{H}$  NMR (500 MHz,  $\text{CDCl}_3$ )  $\delta$  12.53 (s, 1H), 8.16 (s, 1H), 6.81 (s, 1H), 2.66 (s, 3H), 2.58 (s, 3H), 2.57 (s, 3H);  $^{13}\text{C}$  NMR (125 MHz,  $\text{CDCl}_3$ )  $\delta$  203.49, 198.28, 164.54, 149.30, 133.51, 128.85, 121.54, 115.63, 28.93, 26.27, 22.68; HRMS (m/z) (ESI): calcd for  $\text{C}_{11}\text{H}_{12}\text{O}_3$  [ $\text{M}-\text{H}^+$ ]: 191.07074; found: 191.07127.

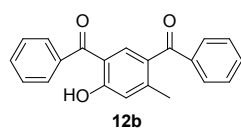

**(4-hydroxy-6-methyl-1,3-phenylene)bis(phenylmethanone).** Isolated by column chromatography (silica gel, PE /EA = 50/1), yellow oil:  $^1\text{H}$  NMR (500 MHz,  $\text{CDCl}_3$ )  $\delta$  12.25 (s, 1H), 9.95 (s, 1H), 7.91-6.92 (m, 10H), 6.81 (s, 1H), 2.42 (s, 3H);  $^{13}\text{C}$  NMR (125 MHz,  $\text{CDCl}_3$ )  $\delta$  200.95, 158.90, 145.86, 139.84, 139.66, 139.06, 132.87, 128.90, 128.79, 128.65, 128.19, 127.05, 122.02, 121.64, 113.26, 22.47; HRMS (m/z) (ESI): calcd for  $\text{C}_{21}\text{H}_{16}\text{O}_3$  [ $\text{M}-\text{H}^+$ ]: 315.10204; found: 315.10306.

## 6 References

1. W. Su and C. Jin, *Synthetic commun.*, 2004, **34**, 4199.

## 7 Copies of $^1\text{H}$ NMR and $^{13}\text{C}$ NMR Spectra of Products

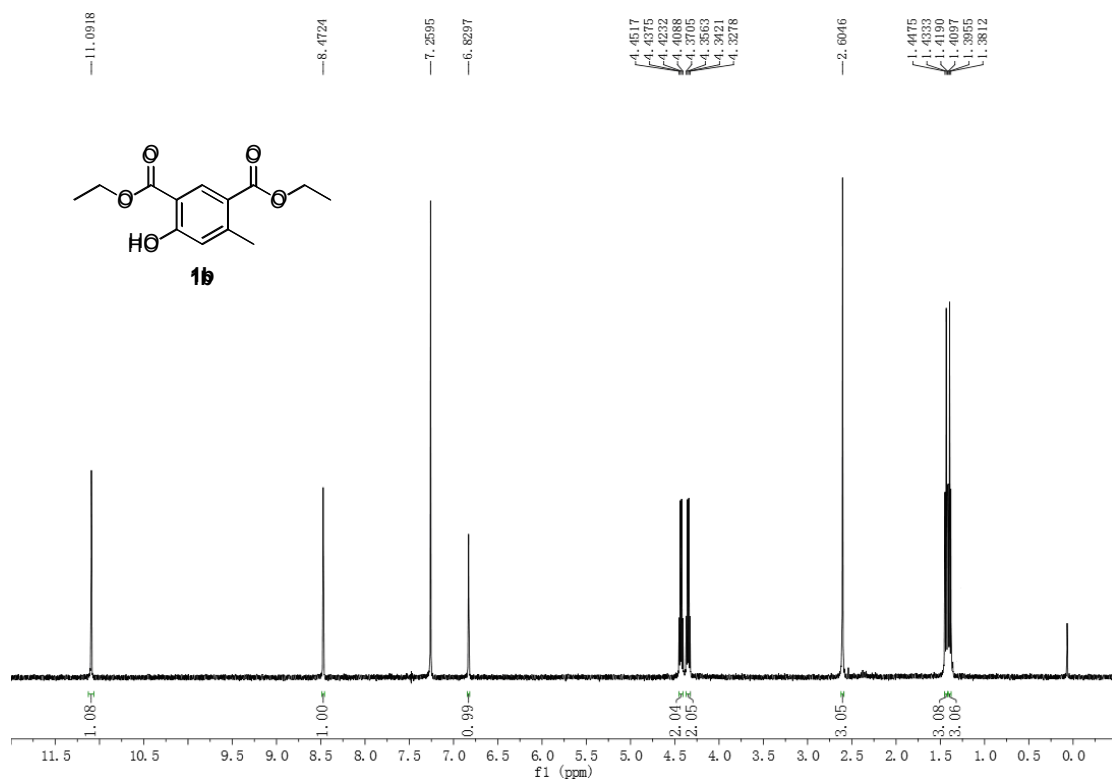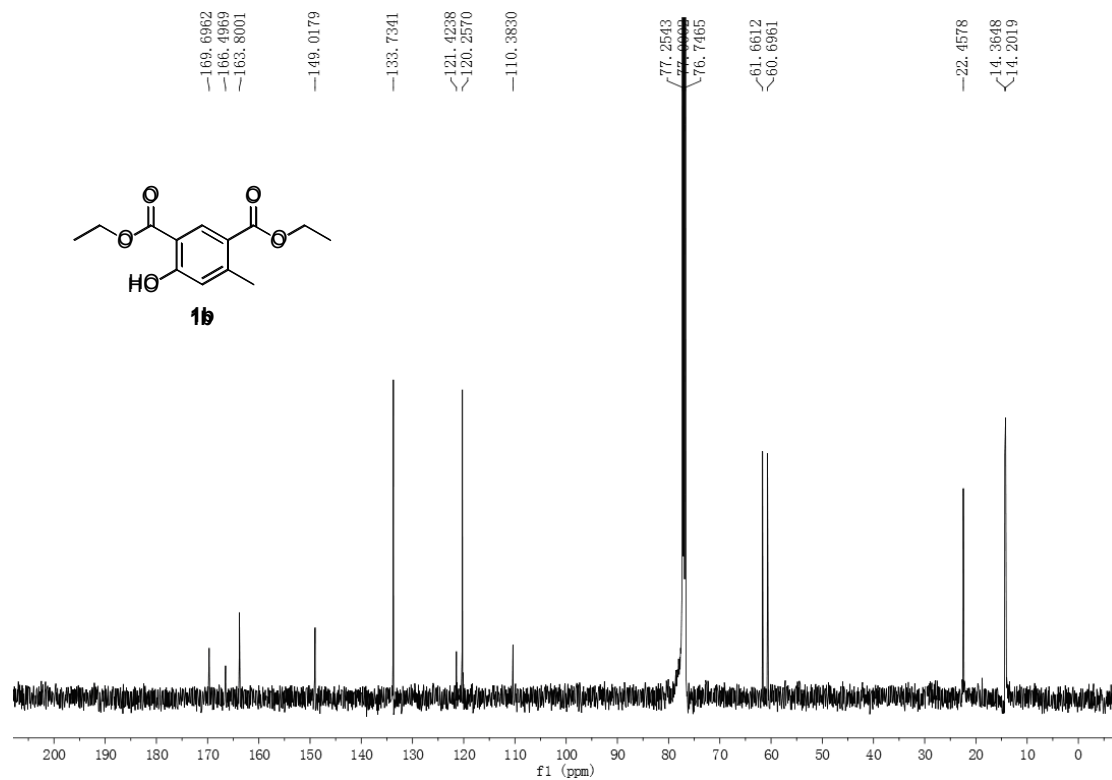



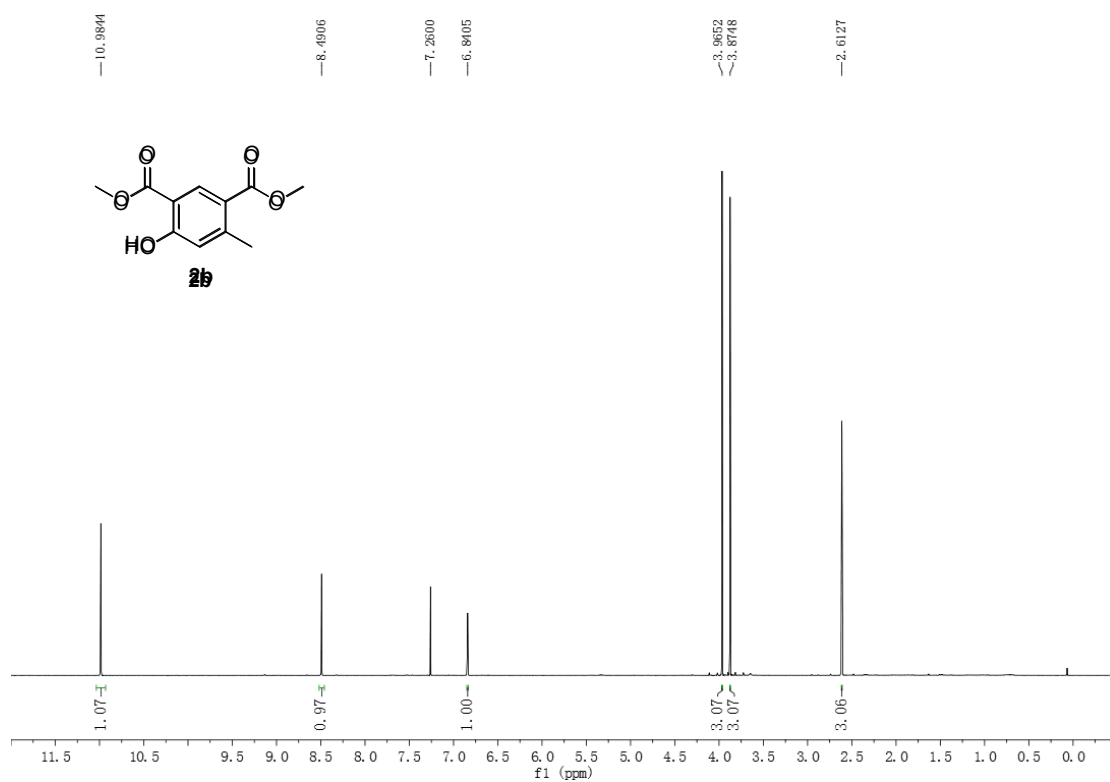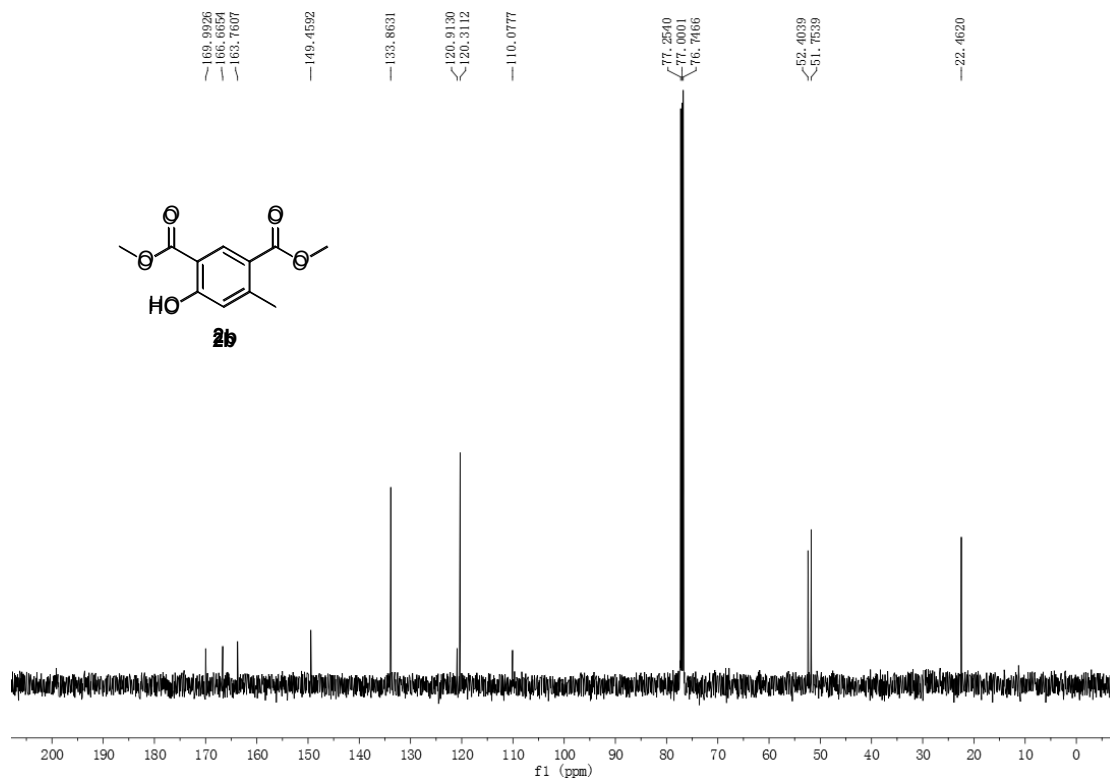

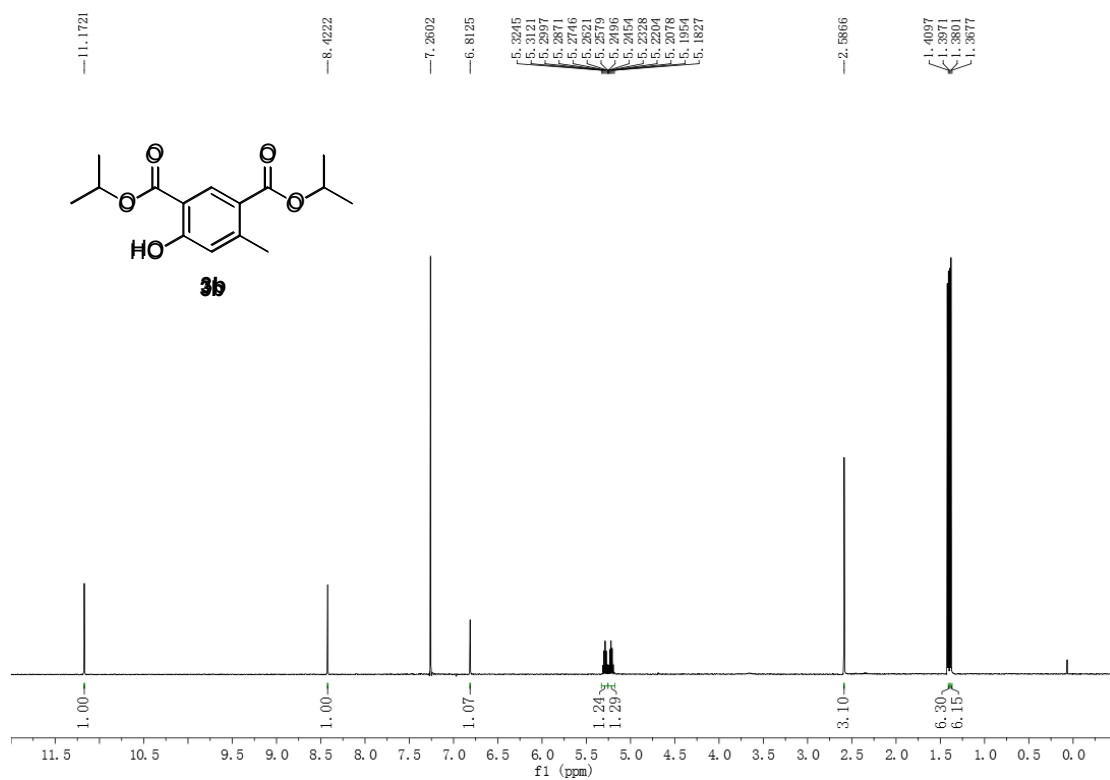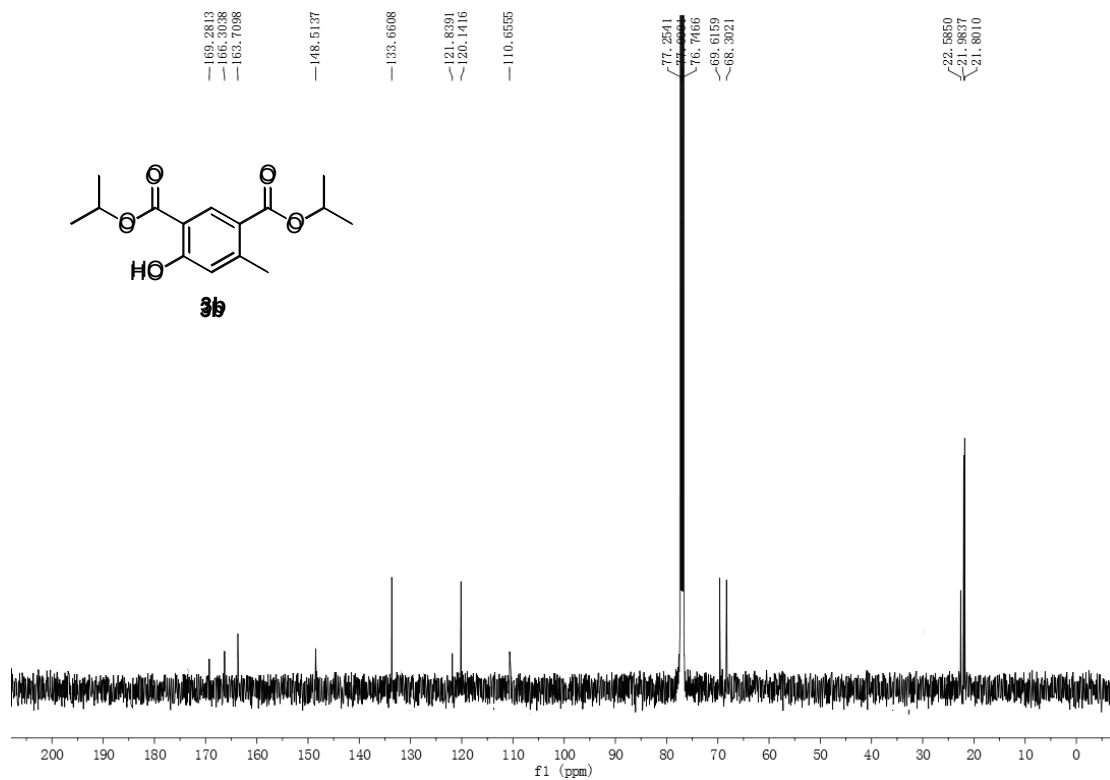

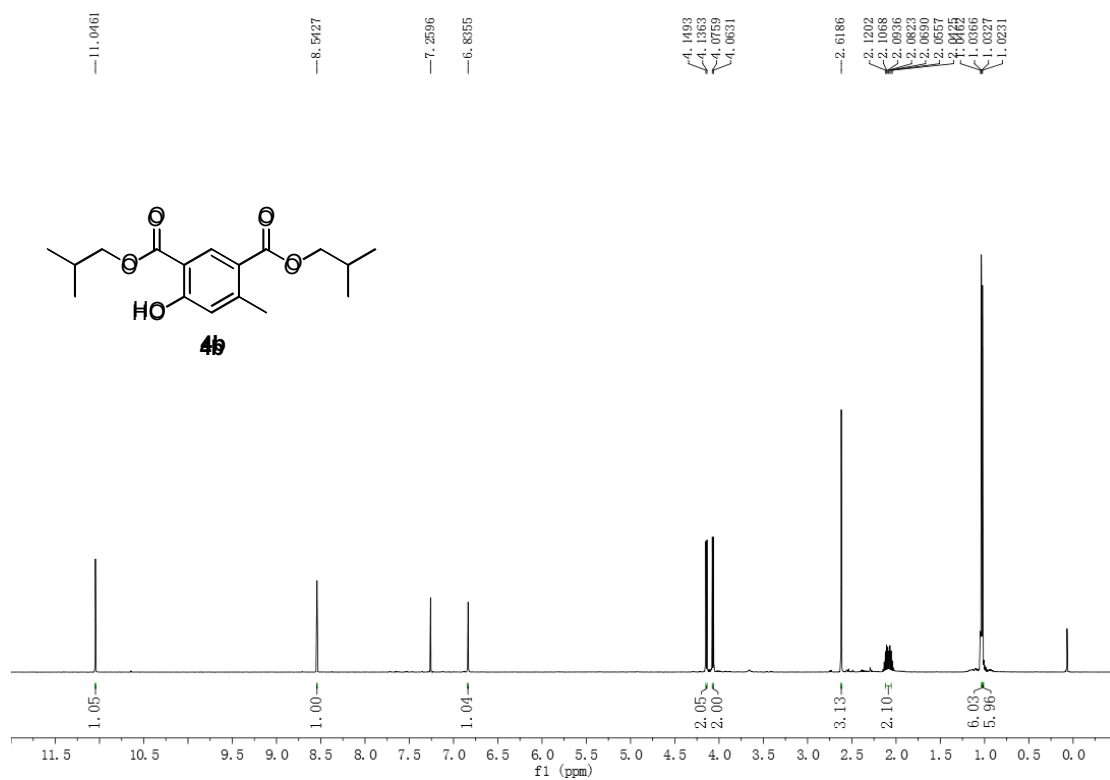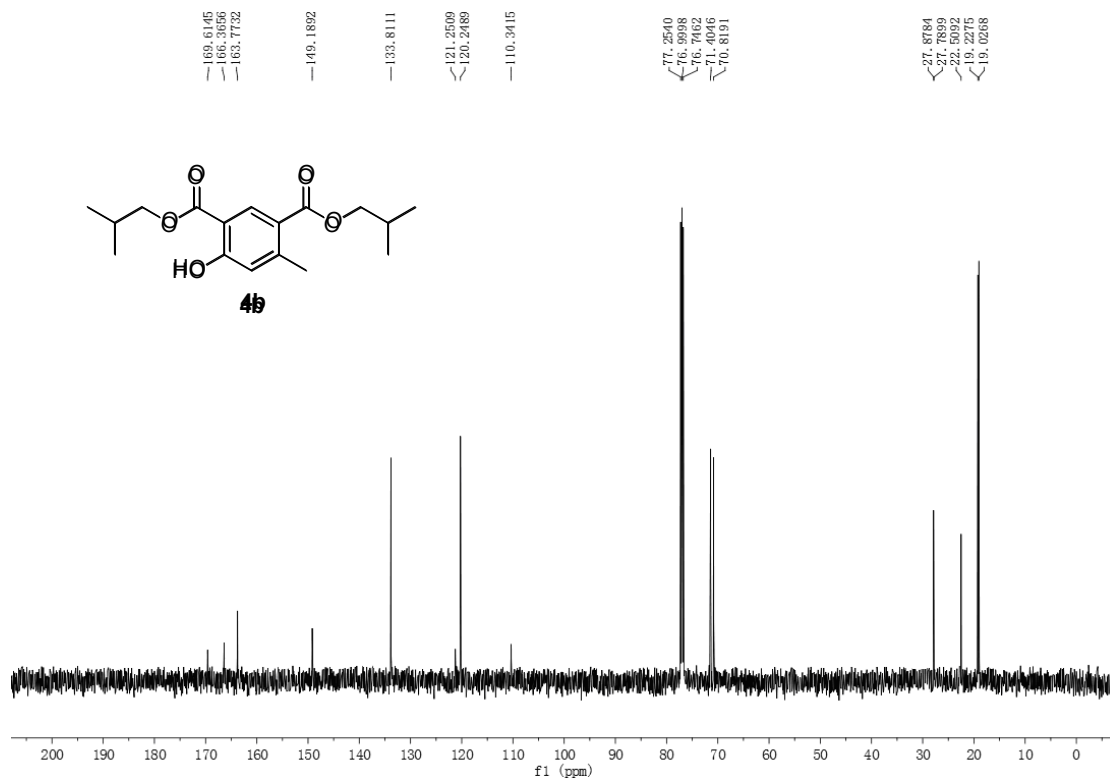

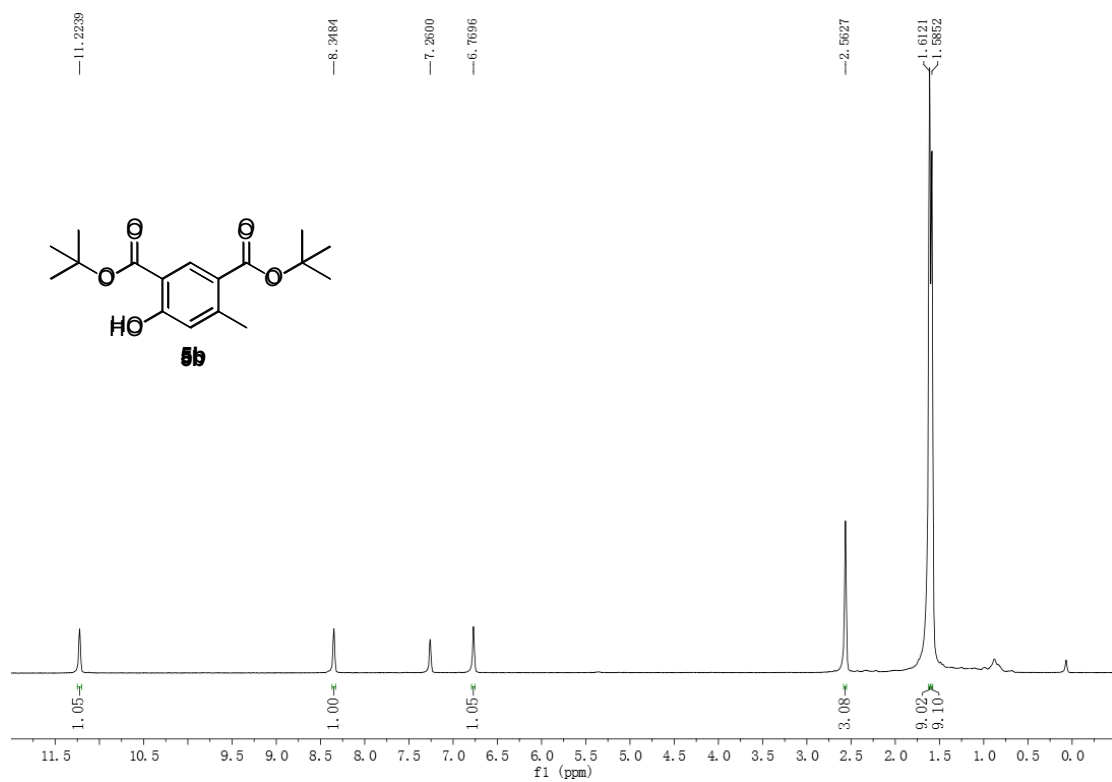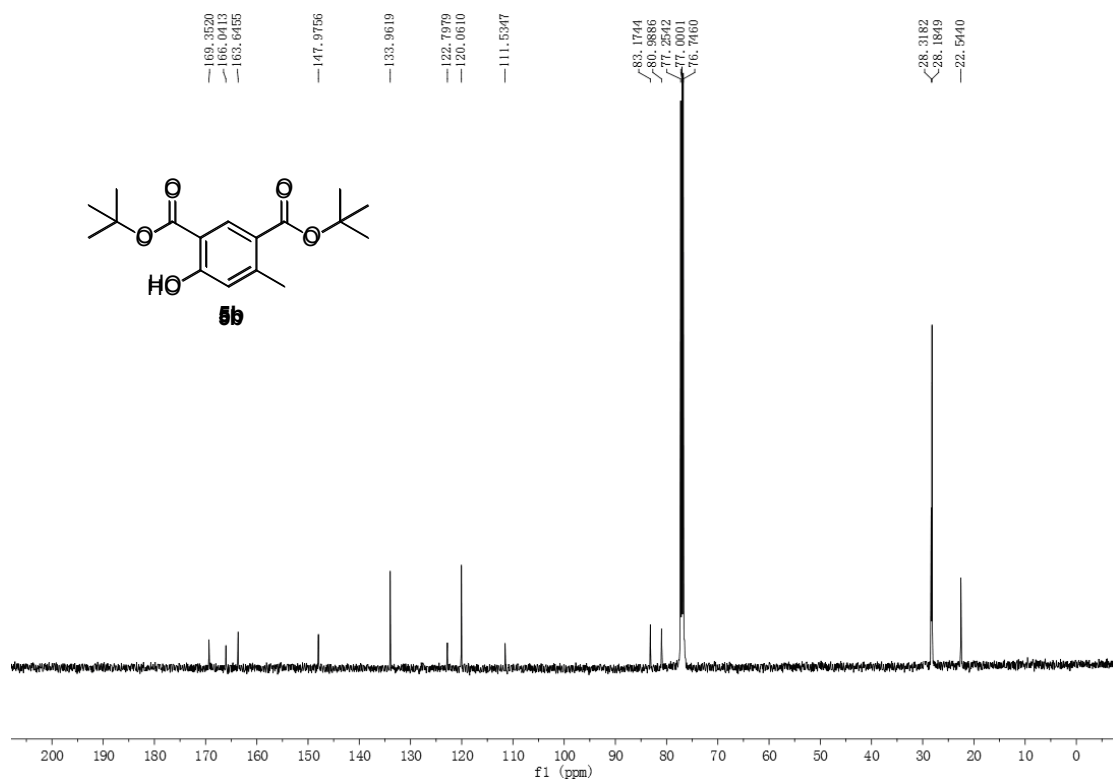

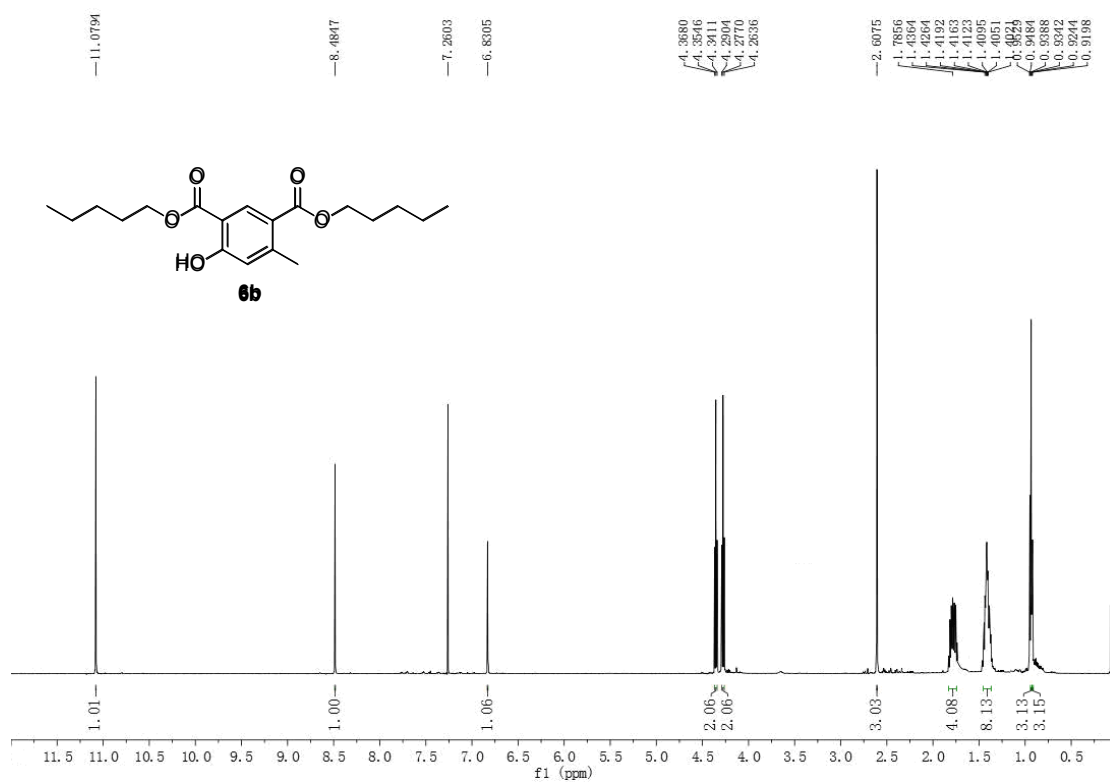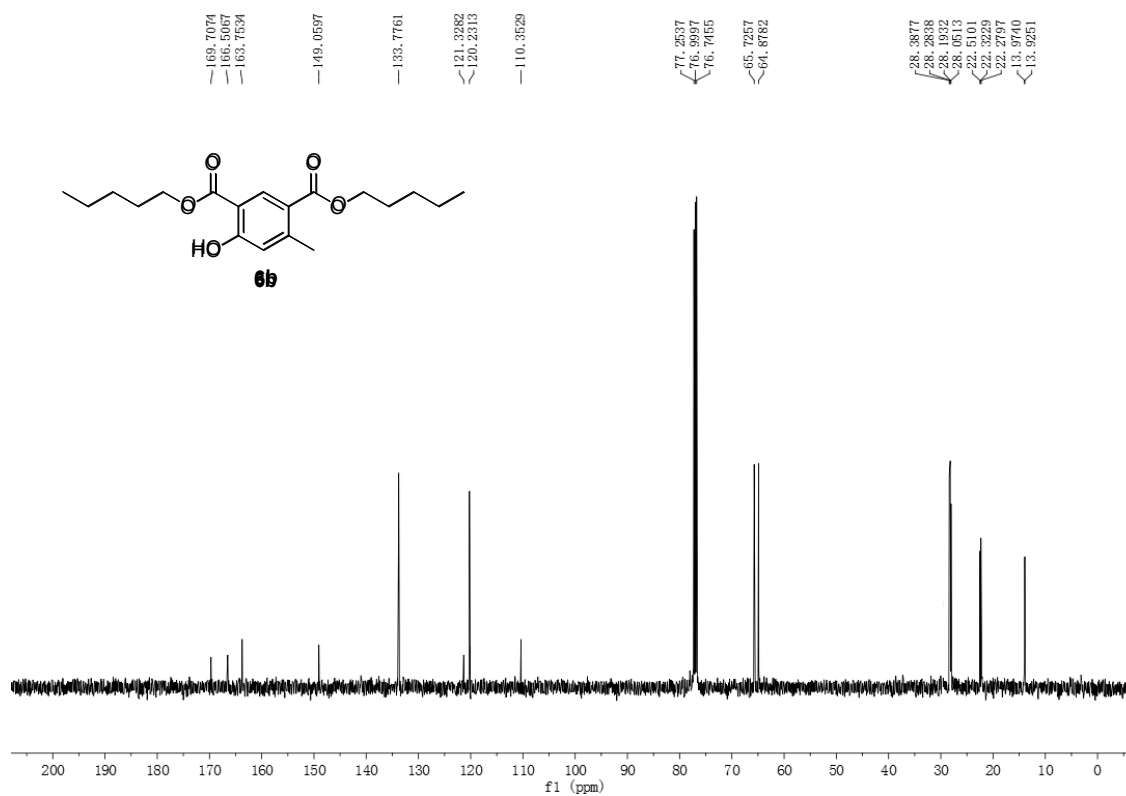

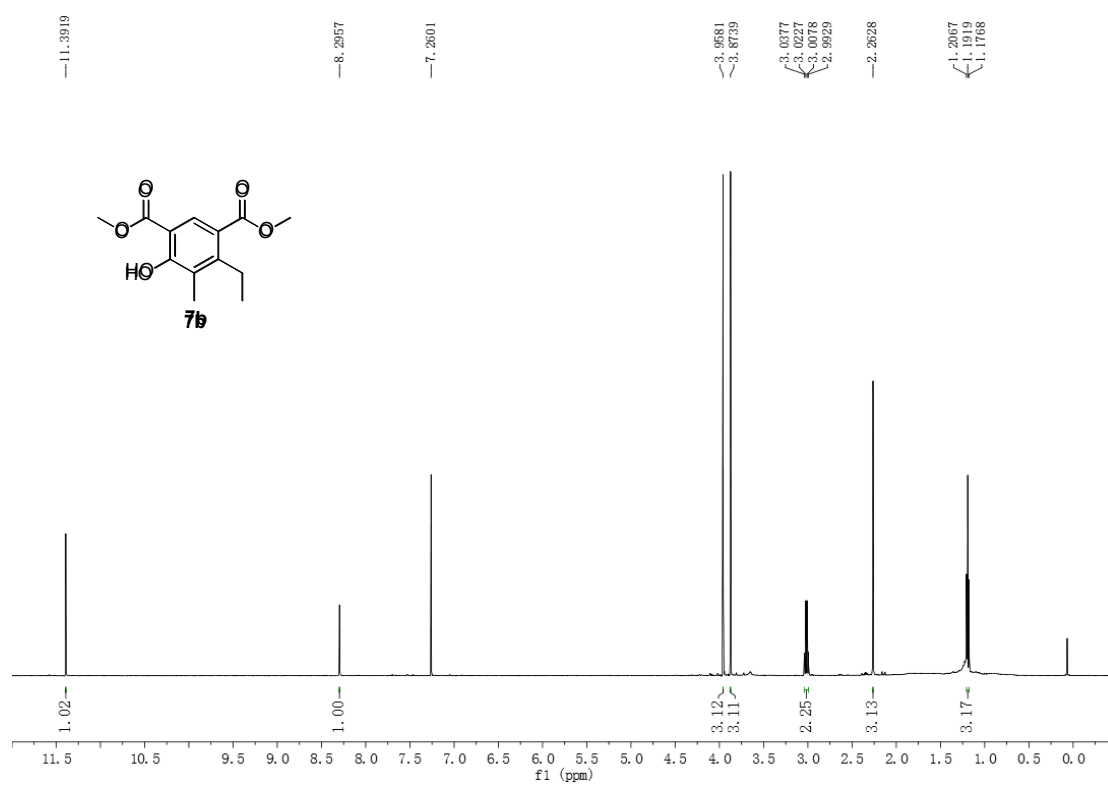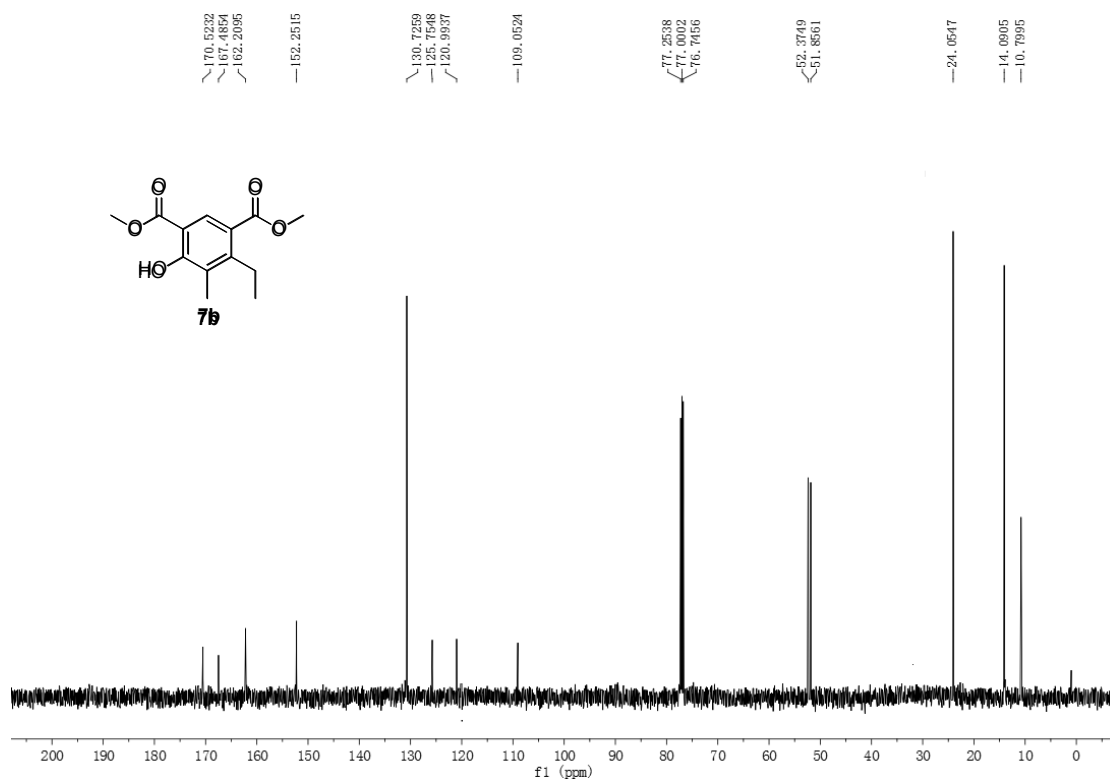

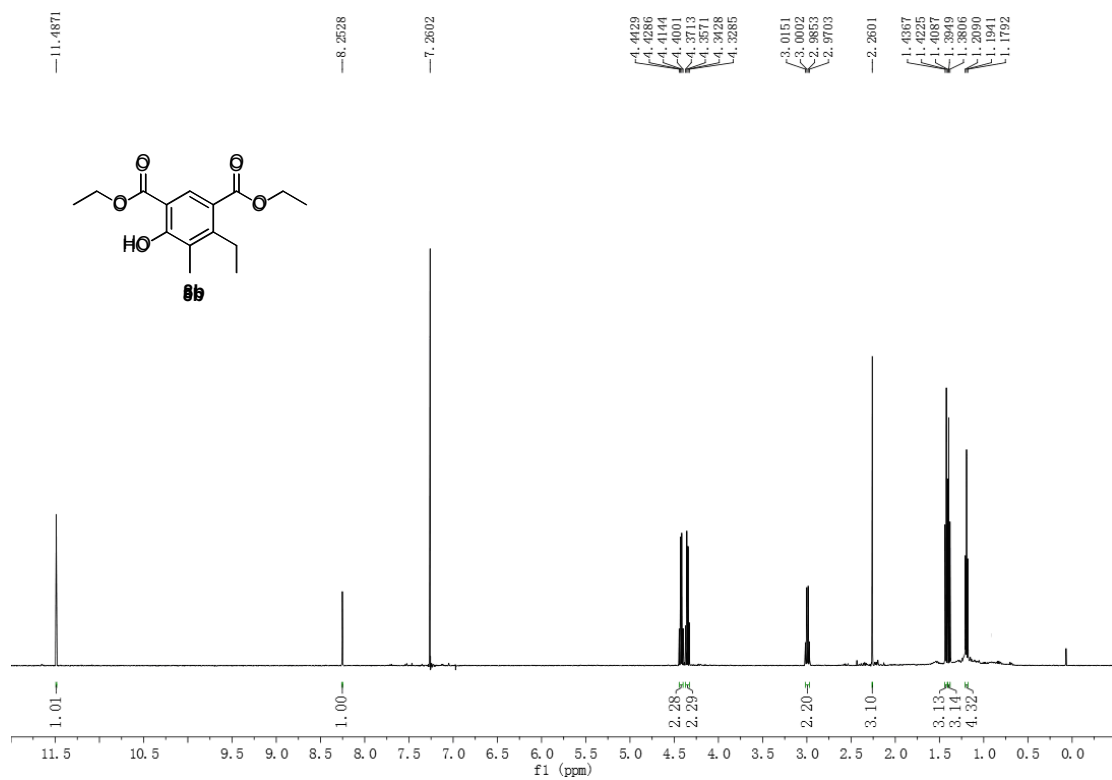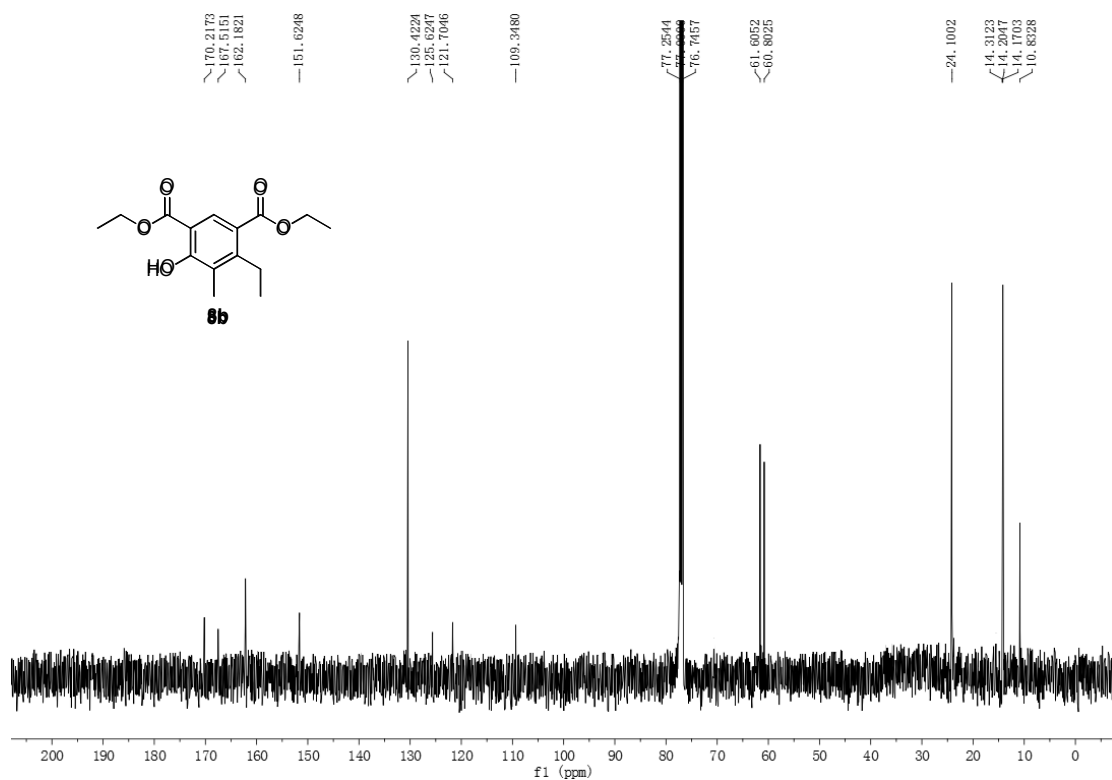

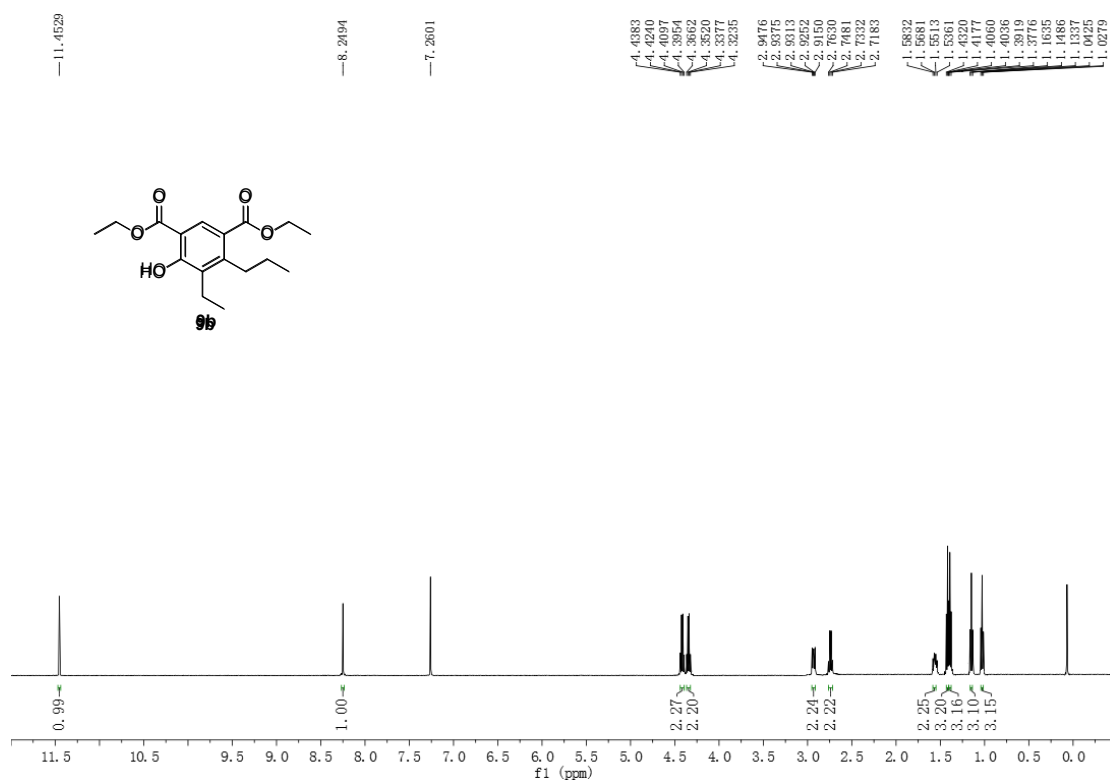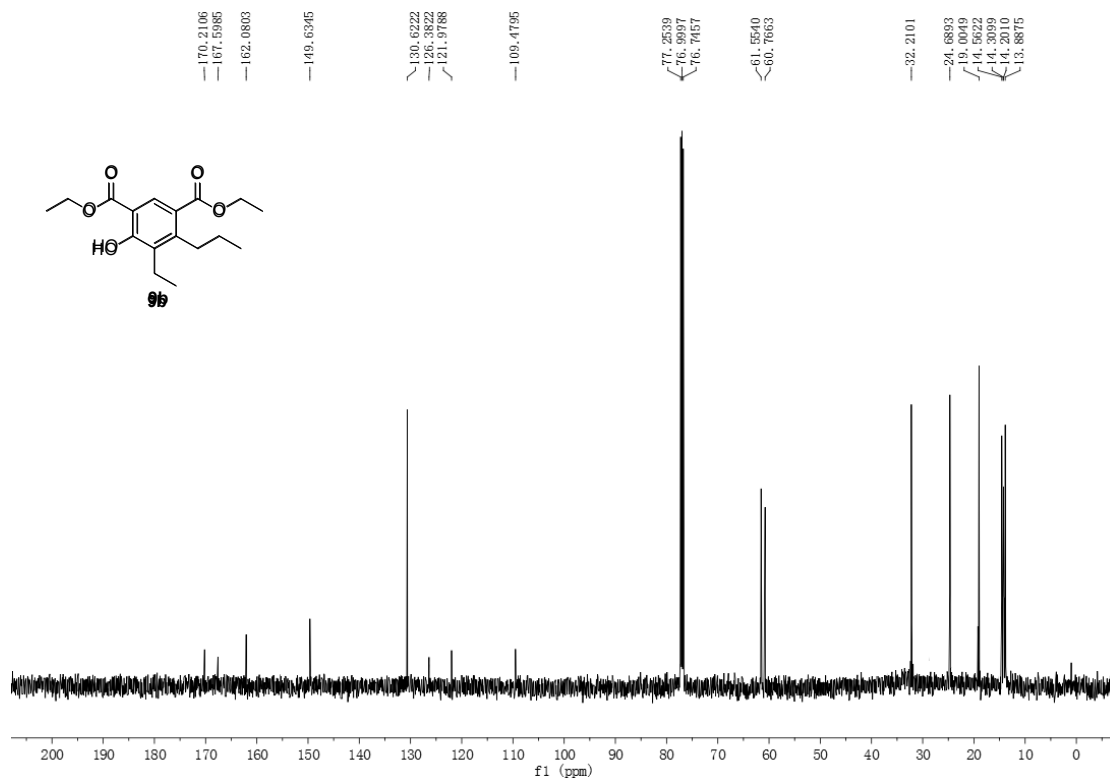



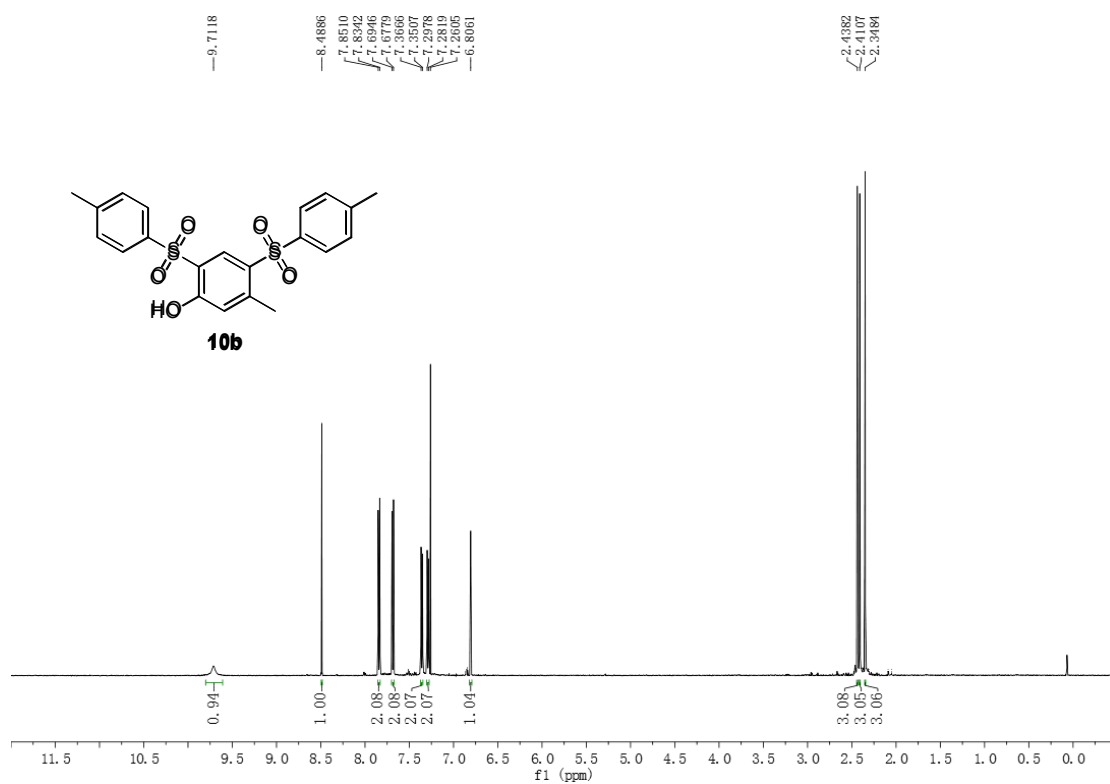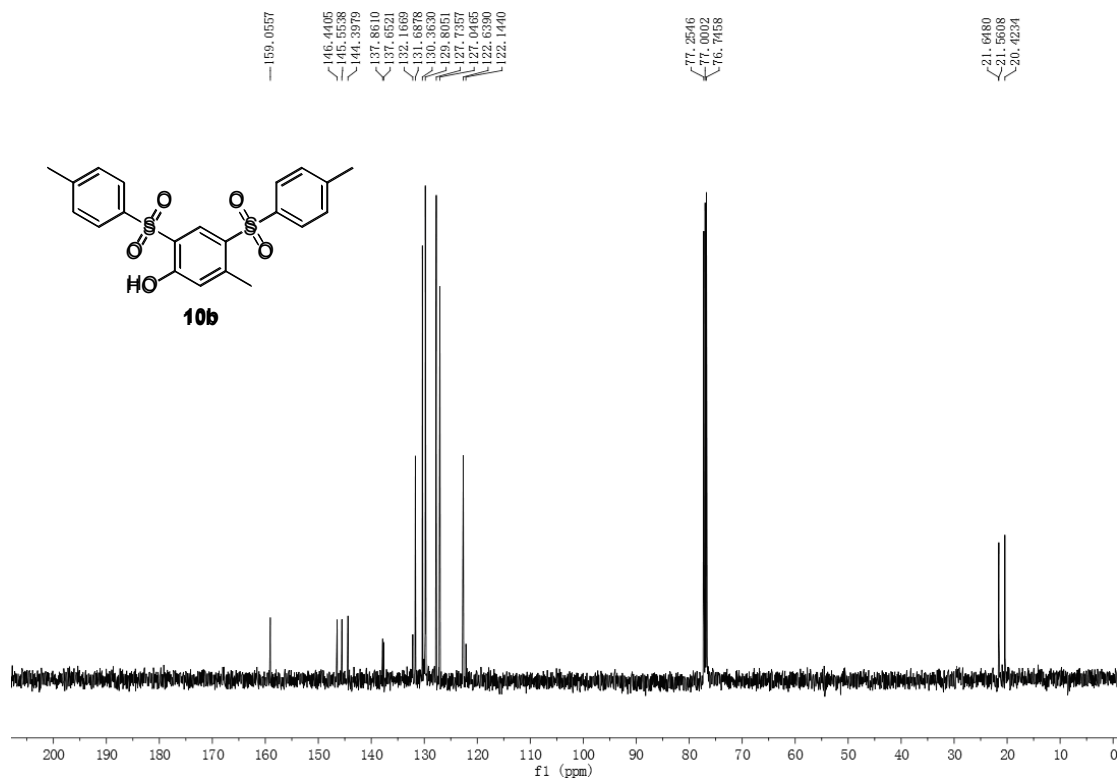

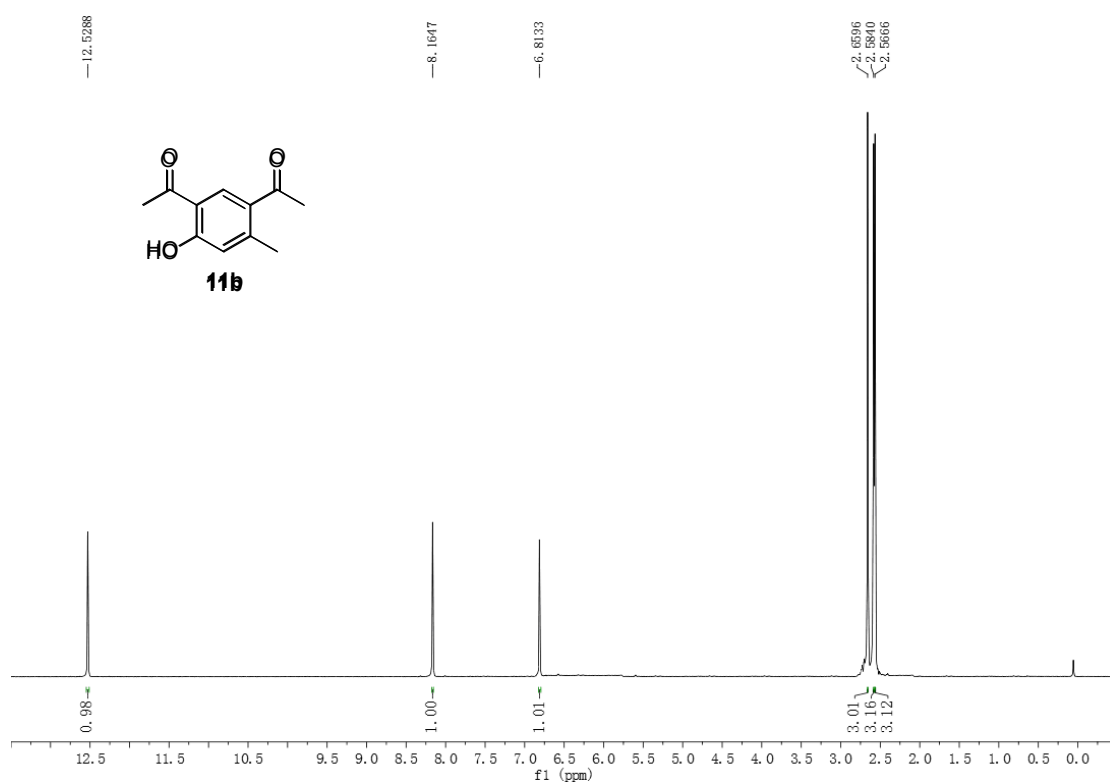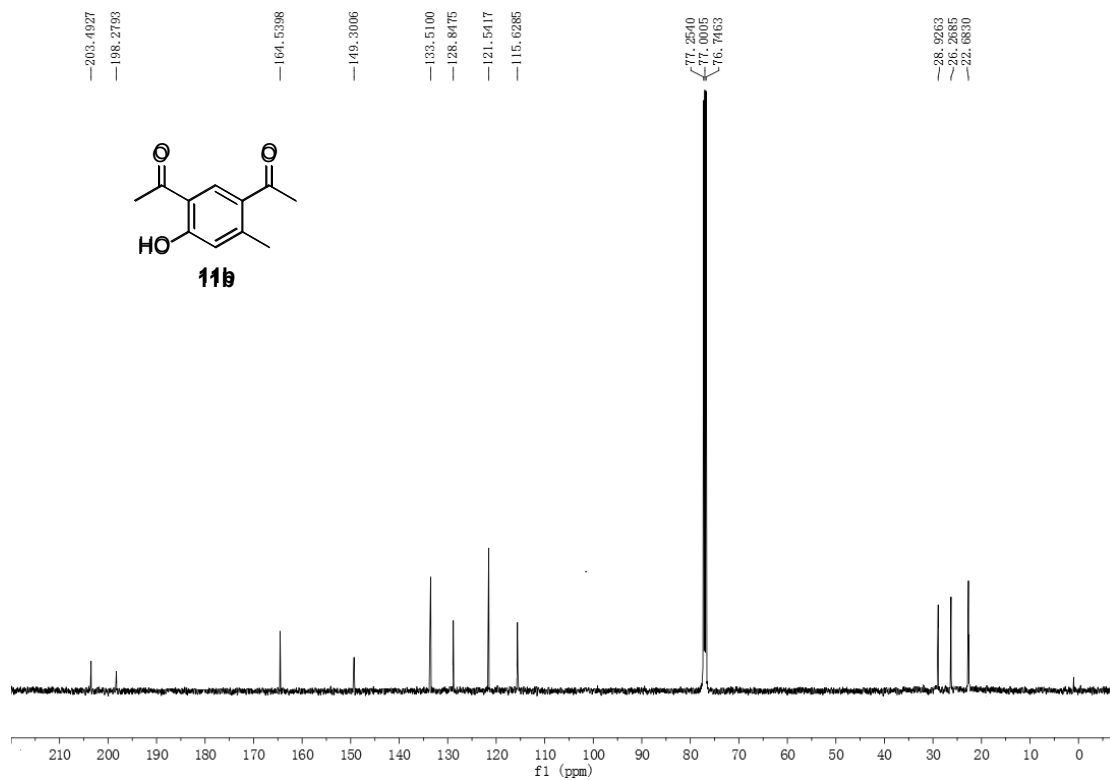

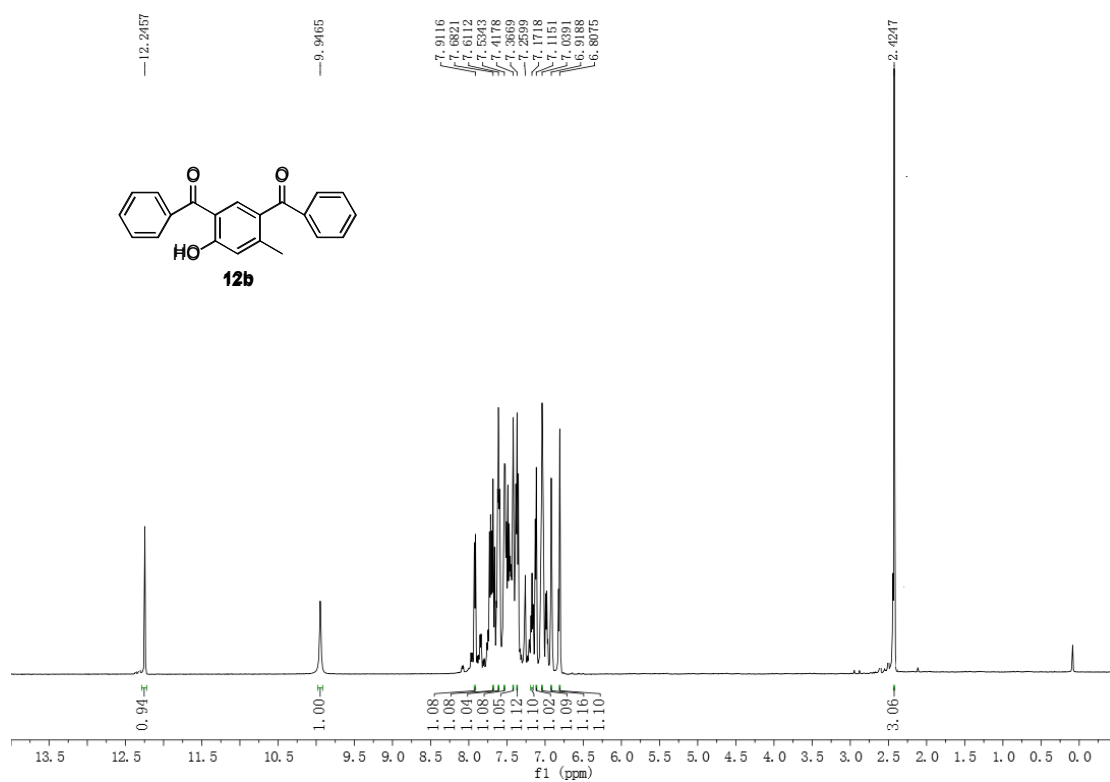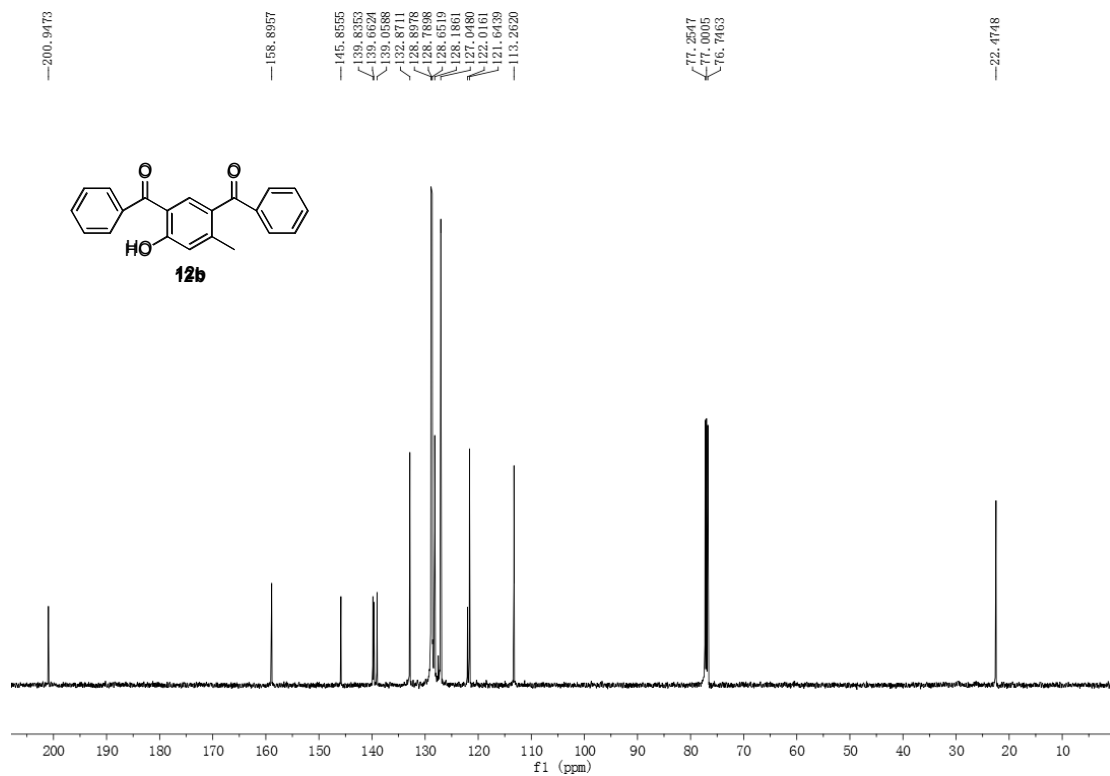

## 8 Copies of HRMS Spectra of Products

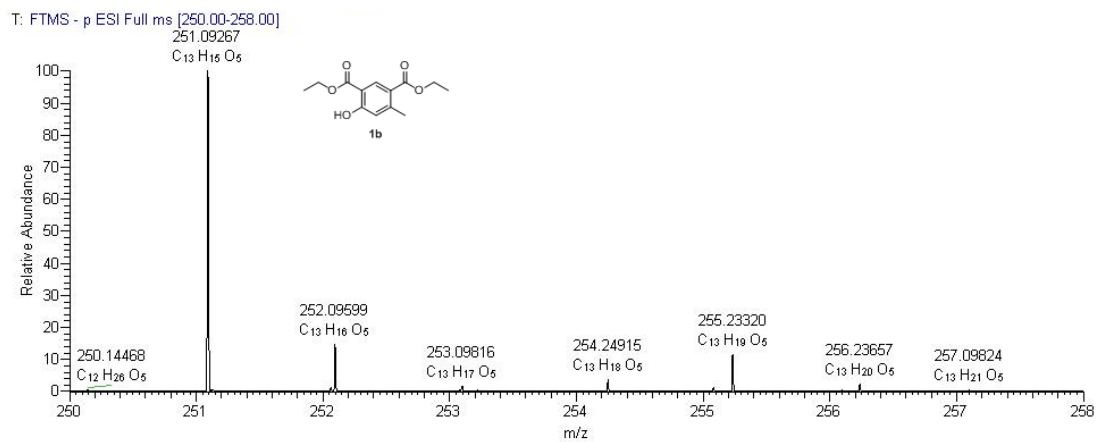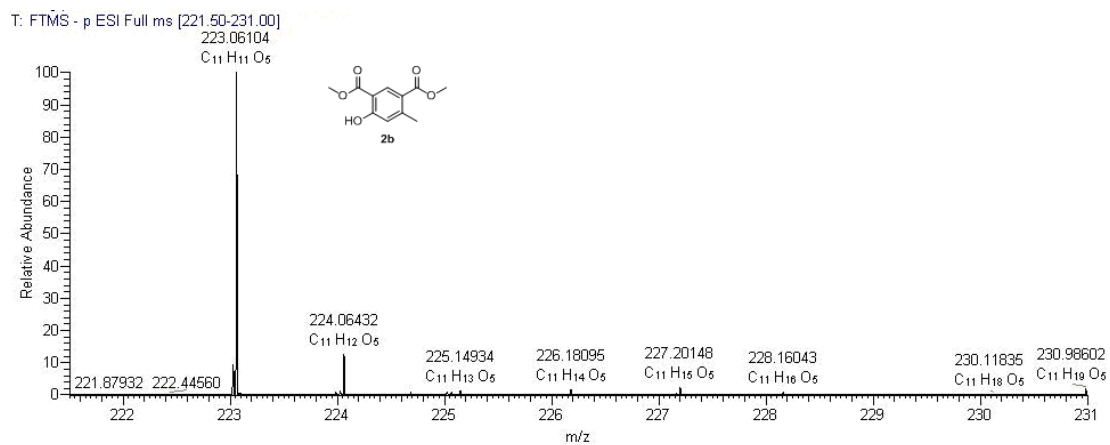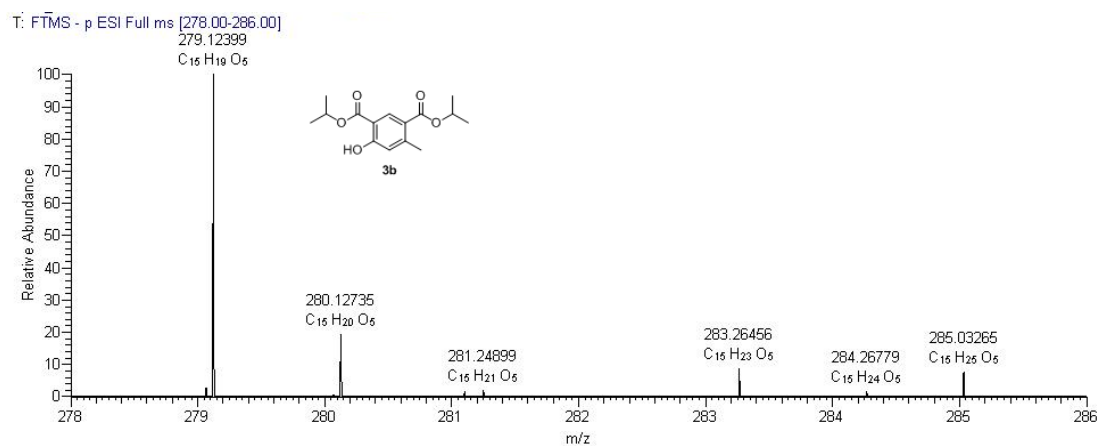

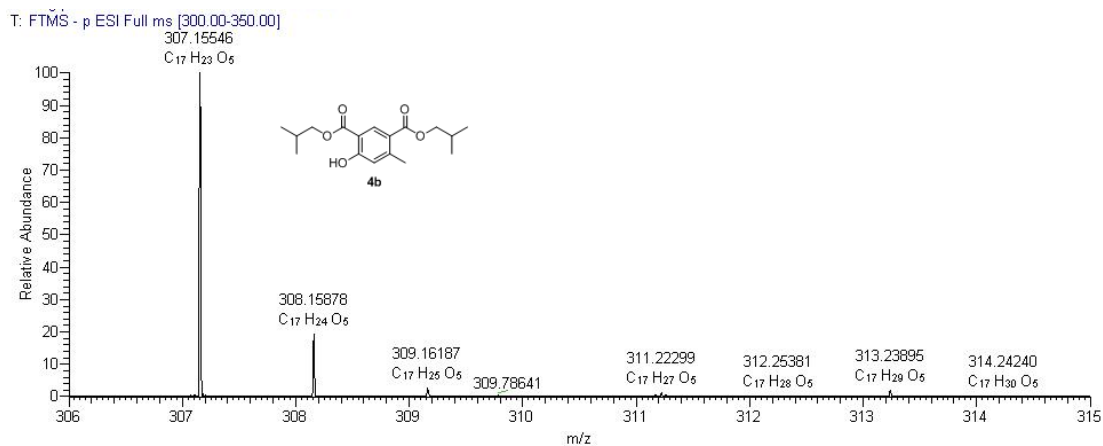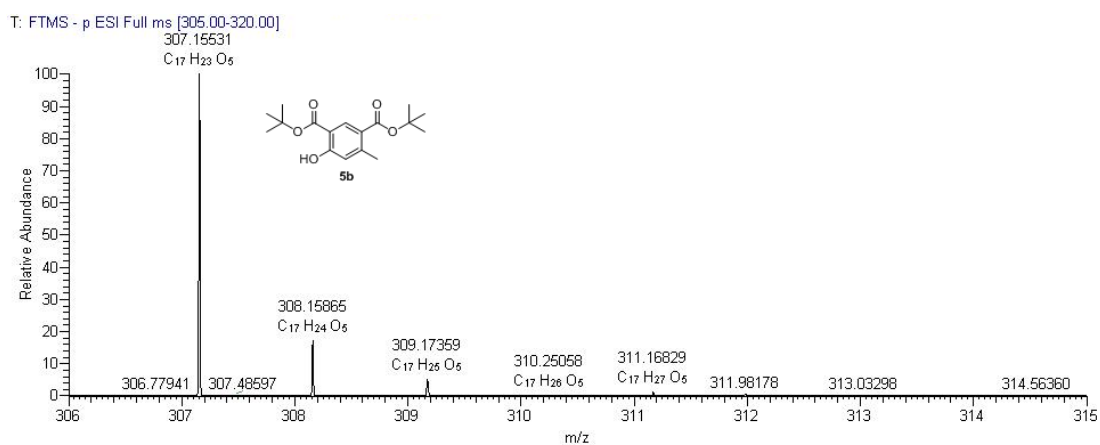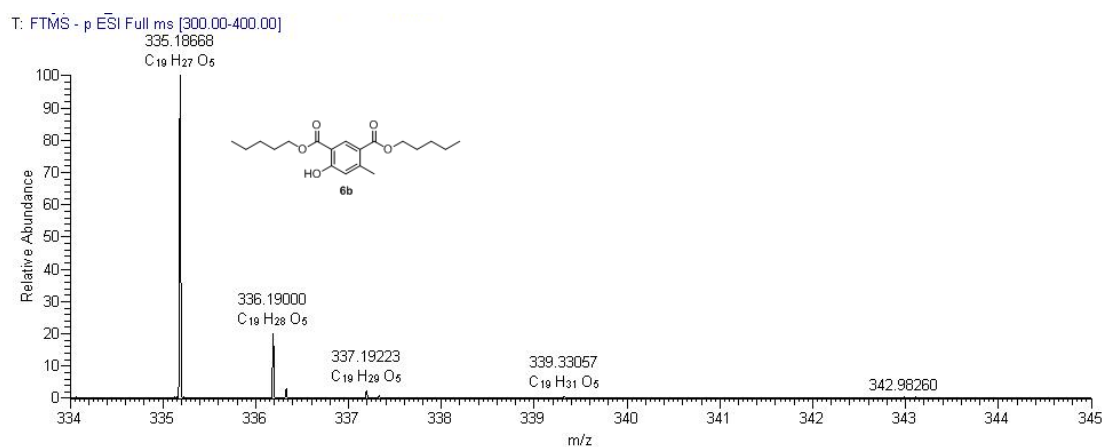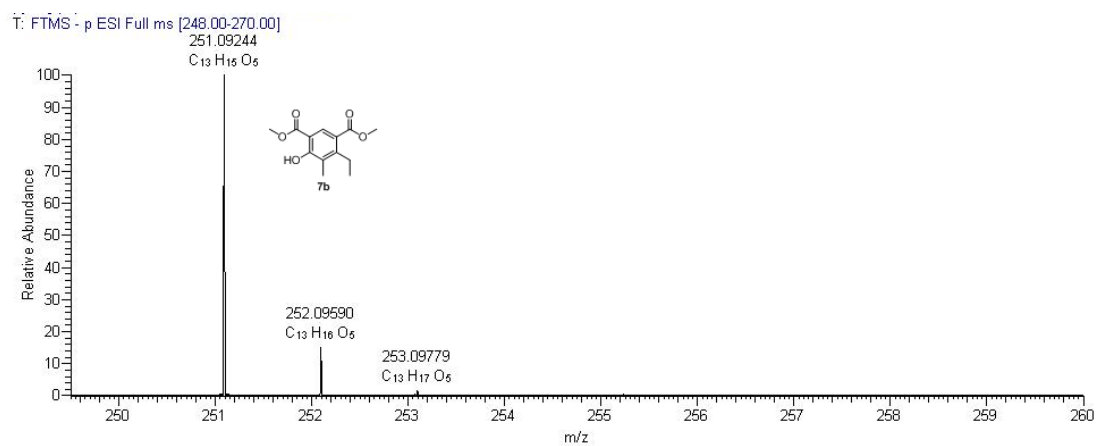

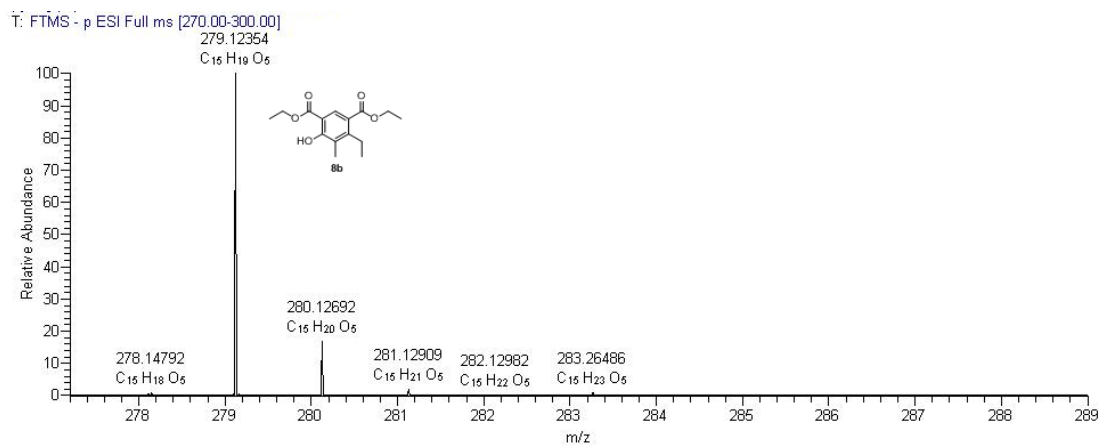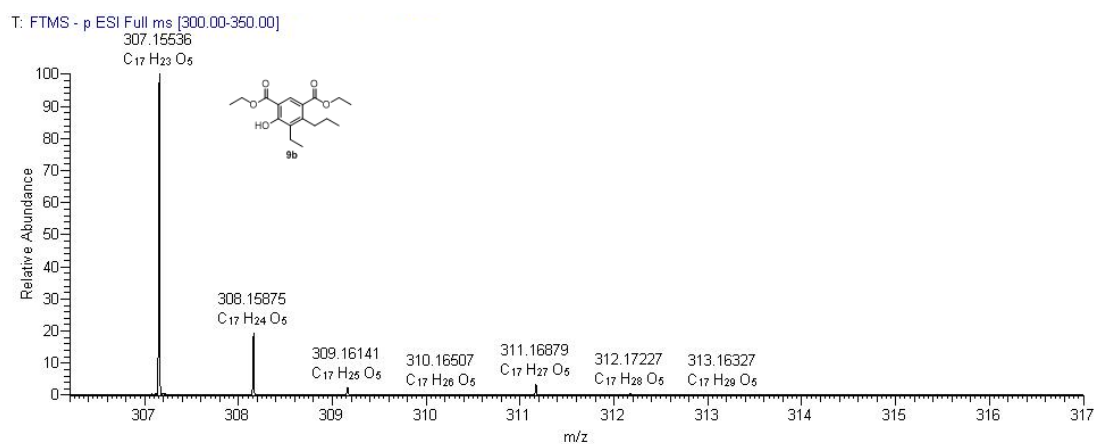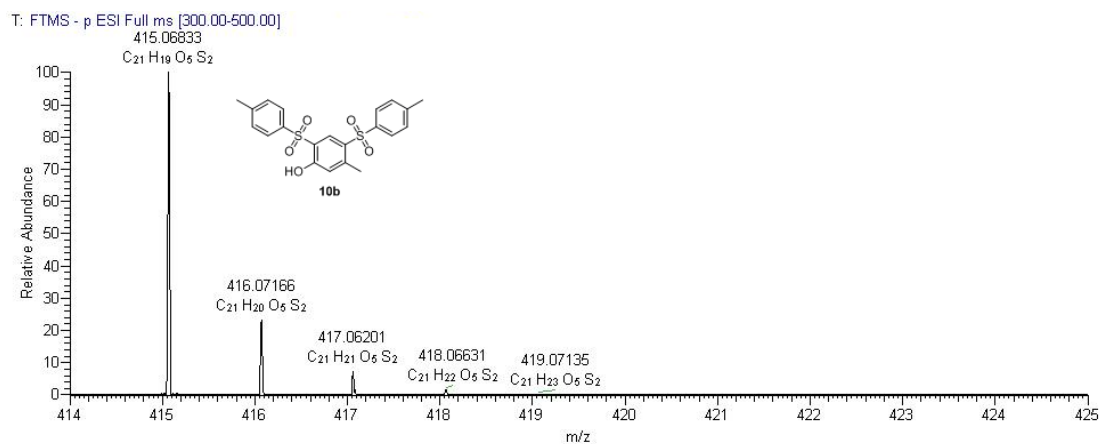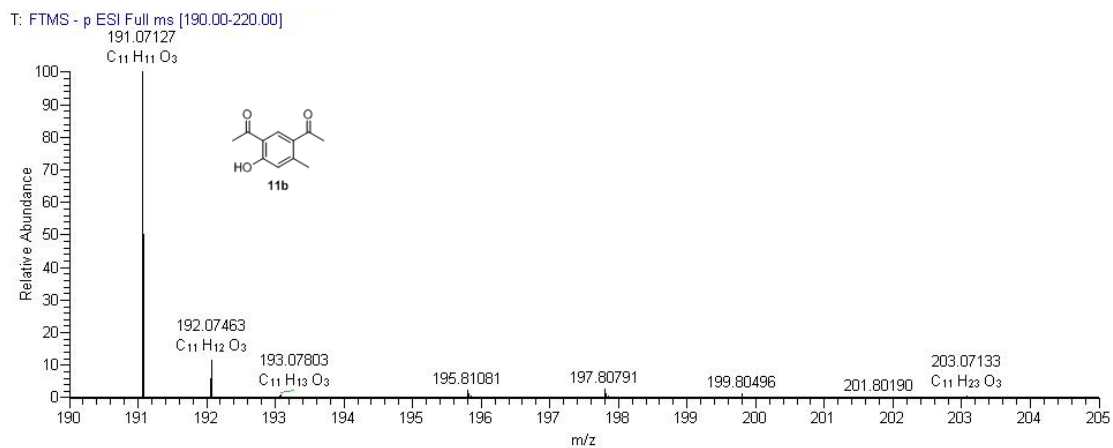

T: FTMS - p ESI sid=20.00 Full ms [314.50-325.00]

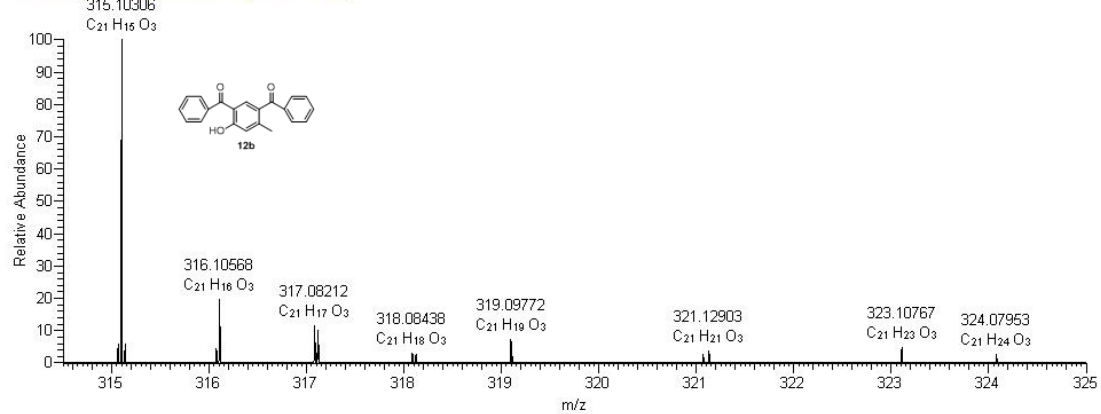

Supplement: c2cc37194d.pdf [file c2cc37194d.pdf]
